# Supplementary material for: Insight into the interface engineering between methylammonium lead halide perovskites and gallium oxide: a first-principles approach
Source: Royal Society of Chemistry journal article supplement (doi:10.1039/d3cp04090a), 2023-01-01
Supplement: d3cp04090a1.pdf [file d3cp04090a1.pdf]

1

## Supplementary Material

2 Insight into the interface engineering between methylammonium lead halide  
3 perovskite and gallium oxide: a first-principles approach

4 Yao Guo<sup>1,\*</sup>, Liuru Fang<sup>1,2</sup>, Qiang Li<sup>3</sup>, Xiaojing Bai<sup>1</sup>, Yuanbin Xue<sup>1</sup>, Changwei Lai<sup>1</sup>,  
5 and Yuhua Wang<sup>2,\*</sup>

6 <sup>1</sup> School of Materials Science and Engineering, Anyang Institute of Technology, Anyang  
7 455000, China

8 <sup>2</sup> Hubei province Key Laboratory of Systems Science in Metallurgical Process, Wuhan  
9 University of Science and Technology, Wuhan 430081, China

10 <sup>3</sup> Department of Physics, Hubei Minzu University, Enshi 445000, China

11

12 \* Corresponding authors:

13 *E-mail:* [guoyao@ayit.edu.cn](mailto:guoyao@ayit.edu.cn) (Y. Guo), [wangyuhua@wust.edu.cn](mailto:wangyuhua@wust.edu.cn) (Y. Wang).

14

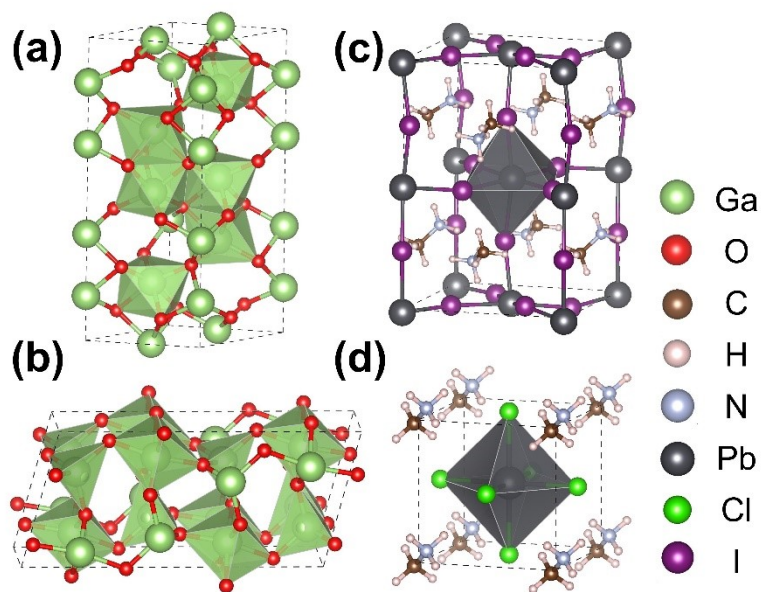

1

2 **Figure S1** Crystal structures of (a)  $\alpha$ - $\text{Ga}_2\text{O}_3$ , (b)  $\beta$ - $\text{Ga}_2\text{O}_3$ , (c) pseudo-tetragonal  $\text{MAPbI}_3$ ,  
 3 and (d) pseudo-cubic  $\text{MAPbCl}_3$ .

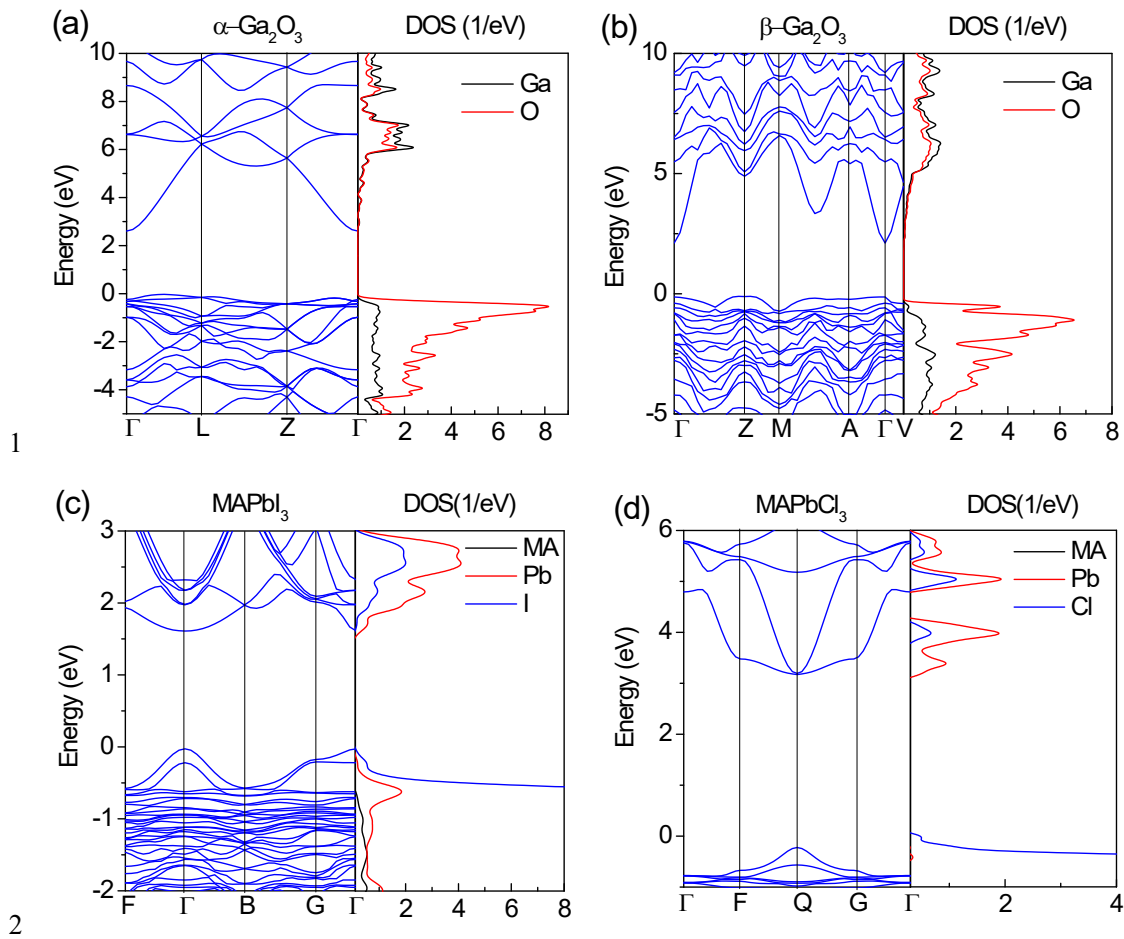

3 **Figure S2** Band structures and DOS of (a)  $\alpha$ - $\text{Ga}_2\text{O}_3$ , (b)  $\beta$ - $\text{Ga}_2\text{O}_3$ , (c) pseudo-tetragonal  
 4  $\text{MAPbI}_3$ , and (d) pseudo-cubic  $\text{MAPbCl}_3$ .

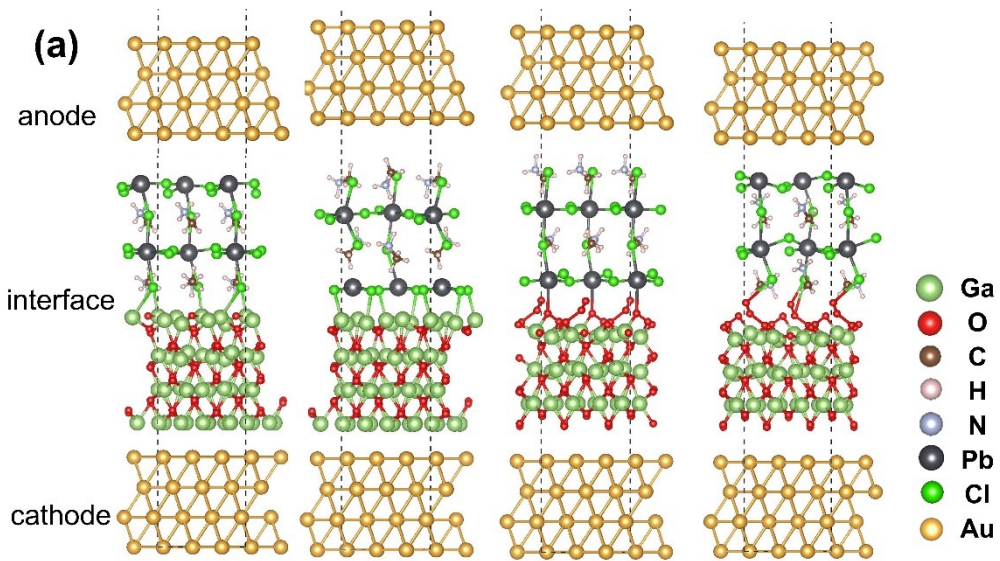

1

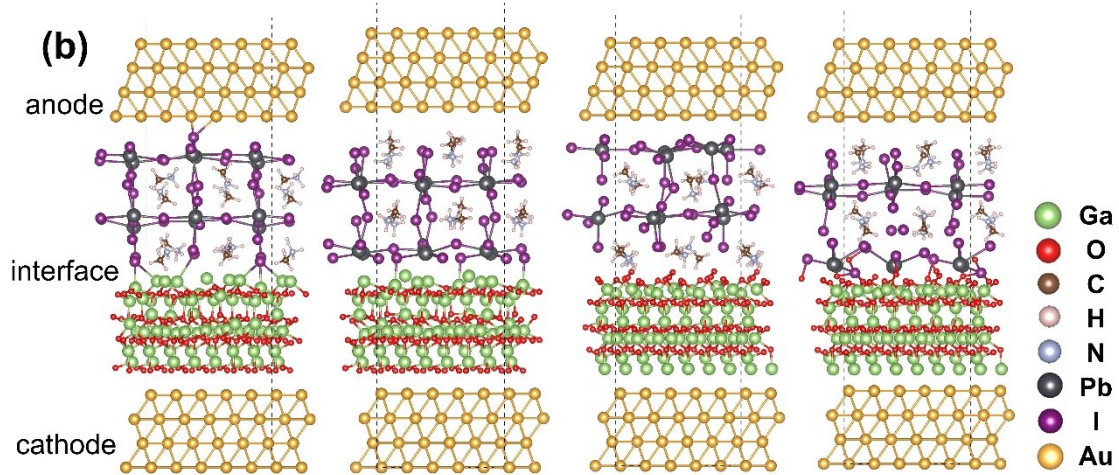

2

3 **Figure S3** Device structures of the perovskite/Ga<sub>2</sub>O<sub>3</sub> interfaces (a) MAPbCl<sub>3</sub>/Ga<sub>2</sub>O<sub>3</sub>, (b)

4 MAPbI<sub>3</sub>/Ga<sub>2</sub>O<sub>3</sub>.

5

6

- 1 **Table S1** Calculated and experimental lattice constants ( $\text{\AA}$ ) of  $\alpha$ -Ga<sub>2</sub>O<sub>3</sub>,  $\beta$ -Ga<sub>2</sub>O<sub>3</sub>,  
 2 pseudo-tetragonal MAPbI<sub>3</sub>, and pseudo-cubic MAPbCl<sub>3</sub>.

|                                          |       | <i>a</i> | <i>b</i> | <i>c</i> |
|------------------------------------------|-------|----------|----------|----------|
| $\alpha$ -Ga <sub>2</sub> O <sub>3</sub> | Calc. | 5.07     | 5.07     | 13.22    |
|                                          | Ref.  | 4.98     | 4.98     | 13.44    |
| $\beta$ -Ga <sub>2</sub> O <sub>3</sub>  | Calc. | 12.28    | 3.07     | 5.84     |
|                                          | Ref.  | 12.22    | 3.04     | 5.81     |
| MAPbCl <sub>3</sub>                      | Calc. | 6.08     | 6.08     | 6.08     |
|                                          | Ref.  | 5.68     | 5.68     | 5.68     |
| MAPbI <sub>3</sub>                       | Calc. | 8.77     | 8.77     | 13.01    |
|                                          | Ref.  | 8.85     | 8.85     | 12.44    |

3

4

1 **Table S2** Lattice parameter (Å) of the free layers and interfaces.

|                                                     | <i>a</i> | <i>b</i> |
|-----------------------------------------------------|----------|----------|
| $\alpha$ -Ga <sub>2</sub> O <sub>3</sub> (110)      | 7.33     | 5.29     |
| $\beta$ -Ga <sub>2</sub> O <sub>3</sub> (-201)      | 7.55     | 3.07     |
| MAPbCl <sub>3</sub> (100)                           | 6.08     | 6.08     |
| MAPbI <sub>3</sub> (110)                            | 13.00    | 12.40    |
| MAPbCl <sub>3</sub> /Ga <sub>2</sub> O <sub>3</sub> | 8.69     | 8.69     |
| MAPbI <sub>3</sub> /Ga <sub>2</sub> O <sub>3</sub>  | 13.02    | 11.39    |

2

3

1 **Table S3** Lattice mismatch (%) of the perovskite/Ga<sub>2</sub>O<sub>3</sub> interfaces.

|                  | MAPbCl <sub>3</sub> /Ga <sub>2</sub> O <sub>3</sub> | MAPbI <sub>3</sub> /Ga <sub>2</sub> O <sub>3</sub> |
|------------------|-----------------------------------------------------|----------------------------------------------------|
| lattice mismatch | 3.6                                                 | 4.5                                                |

2

3

4
